# Supplementary material
Source: MDPI journal article supplement (https://www.mdpi.com/2227-7102/12/12/854)
Supplement: s1 [file s1]

### Supplementary Material S3

#### Individual item scores of TSE and ANX towards AR smart glasses before (PRE) and after (POST) the use of AR technology

| Student | I am motivated to become acquainted with novel technology. (TSE) |      | I am trustful that I know how to use the tools within AR. (TSE) |      | I am curious to become acquainted with novel technology. (TSE) |      | I received sufficient instructions regarding the use of novel technology. (TSE) |      | I can operate effectively the functionalities of the AR system. (TSE) |      | I am able to use the AR equipment and associated technology. (TSE) |      | I am uncomfortable with the fact that AR technology will be really used in our studies. (ANX) |      | I question the need to use this new technology in the future. (ANX) |      | I am afraid of using the equipment incorrectly. (ANX) |      | I do not like the feeling of having to use novel AR technology in my studies. (ANX) |      | I am apprehensive about having to use the AR equipment. (ANX) |      |
|---------|------------------------------------------------------------------|------|-----------------------------------------------------------------|------|----------------------------------------------------------------|------|---------------------------------------------------------------------------------|------|-----------------------------------------------------------------------|------|--------------------------------------------------------------------|------|-----------------------------------------------------------------------------------------------|------|---------------------------------------------------------------------|------|-------------------------------------------------------|------|-------------------------------------------------------------------------------------|------|---------------------------------------------------------------|------|
|         | PRE                                                              | POST | PRE                                                             | POST | PRE                                                            | POST | PRE                                                                             | POST | PRE                                                                   | POST | PRE                                                                | POST | PRE                                                                                           | POST | PRE                                                                 | POST | PRE                                                   | POST | PRE                                                                                 | POST | PRE                                                           | POST |
| 1       | 5                                                                | 5    | 4                                                               | 5    | 5                                                              | 5    | 4                                                                               | 5    | 3                                                                     | 5    | 3                                                                  | 4    | 2                                                                                             | 1    | 2                                                                   | 1    | 2                                                     | 2    | 1                                                                                   | 2    | 2                                                             | 1    |
| 2       | 5                                                                | 4    | 4                                                               | 4    | 5                                                              | 5    | 5                                                                               | 5    | 4                                                                     | 5    | 4                                                                  | 5    | 2                                                                                             | 1    | 1                                                                   | 1    | 2                                                     | 2    | 1                                                                                   | 1    | 1                                                             | 2    |
| 3       | 4                                                                | 4    | 2                                                               | 3    | 4                                                              | 4    | 4                                                                               | 4    | 2                                                                     | 2    | 2                                                                  | 3    | 1                                                                                             | 1    | 1                                                                   | 1    | 4                                                     | 3    | 2                                                                                   | 1    | 1                                                             | 2    |
| 4       | 5                                                                | 5    | 5                                                               | 5    | 5                                                              | 5    | 5                                                                               | 5    | 3                                                                     | 5    | 3                                                                  | 5    | 5                                                                                             | 1    | 2                                                                   | 1    | 2                                                     | 5    | 1                                                                                   | 1    | 4                                                             | 1    |
| 5       | 5                                                                | 5    | 4                                                               | 5    | 5                                                              | 5    | 5                                                                               | 4    | 4                                                                     | 5    | 4                                                                  | 4    | 5                                                                                             | 1    | 2                                                                   | 1    | 2                                                     | 2    | 2                                                                                   | 1    | 2                                                             | 1    |
| 6       | 5                                                                | 5    | 4                                                               | 4    | 5                                                              | 5    | 4                                                                               | 4    | 4                                                                     | 5    | 4                                                                  | 5    | 1                                                                                             | 1    | 2                                                                   | 1    | 3                                                     | 2    | 2                                                                                   | 2    | 1                                                             | 1    |
| 7       | 5                                                                | -    | 3                                                               | 3    | 5                                                              | 5    | 4                                                                               | 3    | 4                                                                     | 2    | 3                                                                  | 2    | 1                                                                                             | 1    | 1                                                                   | 1    | 4                                                     | 4    | 1                                                                                   | 1    | 1                                                             | 1    |
| 8       | 4                                                                | 4    | 4                                                               | 2    | 5                                                              | 4    | 4                                                                               | 3    | 4                                                                     | 2    | 4                                                                  | 2    | 2                                                                                             | 2    | 2                                                                   | 1    | 4                                                     | 4    | 2                                                                                   | 4    | 2                                                             | 3    |
| 9       | 4                                                                | 4    | 4                                                               | 4    | 5                                                              | 4    | 4                                                                               | 4    | 4                                                                     | 4    | 4                                                                  | 4    | 1                                                                                             | 2    | 3                                                                   | 2    | 2                                                     | 2    | 2                                                                                   | 2    | 2                                                             | 2    |
| 10      | 5                                                                | 4    | 2                                                               | 4    | 4                                                              | 4    | 4                                                                               | 5    | 3                                                                     | 3    | 4                                                                  | 4    | 3                                                                                             | 3    | 3                                                                   | 2    | 4                                                     | 2    | 2                                                                                   | 3    | 2                                                             | 2    |

The respondents specified their level of agreement as points: (1) Strongly disagree; (2) Disagree; (3) Neither agree nor disagree; (4) Agree; (5) Strongly agree; (-) no answer.

**Individual item scores of TSE and ANX towards AR mobile device before (PRE) and after (POST) the use of AR technology**

| Student | I am motivated to become acquainted with novel technology. (TSE) |      | I am trustful that I know how to use the tools within AR. (TSE) |      | I am curious to become acquainted with novel technology. (TSE) |      | I received sufficient instructions regarding the use of novel technology. (TSE) |      | I can operate effectively the functionalities of the AR system. (TSE) |      | I am able to use the AR equipment and associated technology. (TSE) |      | I am uncomfortable with the fact that AR technology will be really used in our studies. (ANX) |      | I question the need to use this new technology in the future. (ANX) |      | I am afraid of using the equipment incorrectly. (ANX) |      | I do not like the feeling of having to use novel AR technology in my studies. (ANX) |      | I am apprehensive about having to use the AR equipment. (ANX) |      |
|---------|------------------------------------------------------------------|------|-----------------------------------------------------------------|------|----------------------------------------------------------------|------|---------------------------------------------------------------------------------|------|-----------------------------------------------------------------------|------|--------------------------------------------------------------------|------|-----------------------------------------------------------------------------------------------|------|---------------------------------------------------------------------|------|-------------------------------------------------------|------|-------------------------------------------------------------------------------------|------|---------------------------------------------------------------|------|
|         | PRE                                                              | POST | PRE                                                             | POST | PRE                                                            | POST | PRE                                                                             | POST | PRE                                                                   | POST | PRE                                                                | POST | PRE                                                                                           | POST | PRE                                                                 | POST | PRE                                                   | POST | PRE                                                                                 | POST | PRE                                                           | POST |
| 1       | 4                                                                | 4    | 4                                                               | 4    | 4                                                              | 4    | 4                                                                               | 4    | 4                                                                     | 4    | 4                                                                  | 3    | 2                                                                                             | 2    | 2                                                                   | 3    | 4                                                     | 2    | 3                                                                                   | 3    | 2                                                             | 2    |
| 2       | 4                                                                | 4    | 2                                                               | 5    | 4                                                              | 4    | 4                                                                               | 5    | 4                                                                     | 5    | 4                                                                  | 4    | 1                                                                                             | 1    | 2                                                                   | 2    | 4                                                     | 2    | 2                                                                                   | 1    | 1                                                             | 1    |
| 3       | 5                                                                | 5    | 4                                                               | 4    | 5                                                              | 5    | 4                                                                               | 4    | 3                                                                     | 4    | 3                                                                  | 4    | 1                                                                                             | 1    | 2                                                                   | 2    | 3                                                     | 2    | 2                                                                                   | 2    | 1                                                             | 1    |
| 4       | 2                                                                | 4    | 5                                                               | 5    | 4                                                              | 4    | 5                                                                               | 5    | 4                                                                     | 5    | 4                                                                  | 5    | 3                                                                                             | 2    | 3                                                                   | 3    | 1                                                     | 1    | 2                                                                                   | 3    | 1                                                             | 1    |
| 5       | 5                                                                | 5    | 5                                                               | 3    | 5                                                              | 5    | 5                                                                               | 5    | 3                                                                     | 2    | 4                                                                  | 4    | 1                                                                                             | 1    | 1                                                                   | 1    | 1                                                     | 3    | 1                                                                                   | 1    | 1                                                             | 1    |
| 6       | 4                                                                | 4    | 5                                                               | 3    | 4                                                              | 2    | 3                                                                               | 4    | 4                                                                     | 4    | 4                                                                  | 4    | 2                                                                                             | 2    | 2                                                                   | 2    | 4                                                     | 2    | 1                                                                                   | 2    | 1                                                             | 2    |
| 7       | 4                                                                | 4    | 4                                                               | 3    | 3                                                              | 3    | 5                                                                               | 5    | 3                                                                     | 4    | 2                                                                  | 3    | 2                                                                                             | 2    | 2                                                                   | 2    | 2                                                     | 1    | 2                                                                                   | 2    | 1                                                             | 1    |
| 8       | 4                                                                | 4    | 5                                                               | 4    | 5                                                              | 5    | 5                                                                               | 5    | 4                                                                     | 5    | 4                                                                  | 4    | 3                                                                                             | 3    | 2                                                                   | 2    | 1                                                     | 2    | 2                                                                                   | 3    | 2                                                             | 2    |
| 9       | 4                                                                | 5    | 4                                                               | 5    | 4                                                              | 4    | 4                                                                               | 4    | 3                                                                     | 4    | 4                                                                  | 4    | 1                                                                                             | 1    | 3                                                                   | 2    | 2                                                     | 2    | 2                                                                                   | 1    | 1                                                             | 1    |
| 10      | 4                                                                | 5    | 4                                                               | 5    | 4                                                              | 4    | 5                                                                               | 5    | 3                                                                     | 4    | 4                                                                  | 4    | 1                                                                                             | 1    | 1                                                                   | 2    | 4                                                     | 2    | 1                                                                                   | 1    | 1                                                             | 1    |
| 11      | 2                                                                | 5    | 4                                                               | 4    | 3                                                              | 4    | 5                                                                               | 4    | 5                                                                     | 4    | 4                                                                  | 5    | 2                                                                                             | 2    | 2                                                                   | 1    | 2                                                     | 1    | 4                                                                                   | 2    | 2                                                             | 1    |
| 12      | 4                                                                | 3    | 4                                                               | 4    | 4                                                              | 3    | 4                                                                               | 5    | 3                                                                     | 5    | 4                                                                  | 5    | 2                                                                                             | 2    | 2                                                                   | 2    | 1                                                     | 1    | 4                                                                                   | 4    | 1                                                             | 1    |
| 13      | 4                                                                | 5    | 2                                                               | 4    | 4                                                              | 4    | 5                                                                               | 5    | 3                                                                     | 5    | 3                                                                  | 5    | 4                                                                                             | 2    | 3                                                                   | 3    | 4                                                     | 2    | 2                                                                                   | 2    | 1                                                             | 2    |
| 14      | 3                                                                | 5    | 2                                                               | 4    | 2                                                              | 4    | 5                                                                               | 5    | 3                                                                     | 5    | 3                                                                  | 5    | 4                                                                                             | 3    | 3                                                                   | 3    | 4                                                     | 2    | 4                                                                                   | 4    | 2                                                             | 2    |
| 15      | 4                                                                | 5    | 5                                                               | 5    | 5                                                              | 5    | 5                                                                               | 5    | 4                                                                     | 5    | 4                                                                  | 5    | 2                                                                                             | 1    | 1                                                                   | 2    | 1                                                     | 1    | 1                                                                                   | 1    | 1                                                             | 1    |
| 16      | 4                                                                | 4    | 4                                                               | 4    | 5                                                              | 5    | 5                                                                               | 5    | 4                                                                     | 5    | 4                                                                  | 5    | 1                                                                                             | 1    | 1                                                                   | 1    | 1                                                     | 1    | 1                                                                                   | 1    | 1                                                             | 1    |
| 17      | 5                                                                | 5    | 5                                                               | 5    | 5                                                              | 5    | 5                                                                               | 5    | 4                                                                     | 5    | 4                                                                  | 5    | 1                                                                                             | 1    | 1                                                                   | 2    | 2                                                     | 3    | 2                                                                                   | 1    | 2                                                             | 1    |
| 18      | 5                                                                | 5    | 4                                                               | 5    | 5                                                              | 5    | 5                                                                               | 5    | 2                                                                     | 5    | 1                                                                  | 4    | 1                                                                                             | 1    | 2                                                                   | 1    | 3                                                     | 3    | 1                                                                                   | 1    | 1                                                             | 1    |
| 19      | 4                                                                | 5    | 4                                                               | 5    | 5                                                              | 5    | 5                                                                               | 5    | 4                                                                     | 5    | 4                                                                  | 5    | 1                                                                                             | 1    | 2                                                                   | 1    | 3                                                     | 1    | 2                                                                                   | 1    | 1                                                             | 1    |
| 20      | 4                                                                | 5    | 4                                                               | 5    | 5                                                              | 5    | 5                                                                               | 5    | 4                                                                     | 5    | 4                                                                  | 5    | 1                                                                                             | 1    | 2                                                                   | 1    | 3                                                     | 1    | 1                                                                                   | 1    | 1                                                             | 1    |
| 21      | 4                                                                | 5    | 3                                                               | 4    | 4                                                              | 4    | 5                                                                               | 5    | 3                                                                     | 4    | 2                                                                  | 4    | 1                                                                                             | 1    | 1                                                                   | 1    | 3                                                     | 2    | 1                                                                                   | 1    | 2                                                             | 1    |
| 22      | 4                                                                | 4    | 4                                                               | 4    | 3                                                              | 4    | 4                                                                               | 5    | 3                                                                     | 4    | 3                                                                  | 4    | 1                                                                                             | 1    | 2                                                                   | 2    | 3                                                     | 2    | 2                                                                                   | 2    | 2                                                             | 1    |
| 23      | 4                                                                | 4    | 5                                                               | 5    | 5                                                              | 5    | 4                                                                               | 5    | 5                                                                     | 5    | 4                                                                  | 5    | 2                                                                                             | 4    | 2                                                                   | 2    | 2                                                     | 1    | 3                                                                                   | 1    | 1                                                             | 1    |
| 24      | 4                                                                | 5    | 4                                                               | 5    | 4                                                              | 5    | 5                                                                               | 5    | 4                                                                     | 5    | 4                                                                  | 5    | 3                                                                                             | 2    | 2                                                                   | 2    | 2                                                     | 2    | 2                                                                                   | 1    | 2                                                             | 2    |
| 25      | 5                                                                | 4    | 4                                                               | 4    | 4                                                              | 4    | 5                                                                               | 5    | 3                                                                     | 4    | 1                                                                  | 5    | 2                                                                                             | 2    | 3                                                                   | 3    | 2                                                     | 3    | 1                                                                                   | 1    | 1                                                             | 1    |
| 26      | 5                                                                | 5    | 5                                                               | 5    | 4                                                              | 5    | 5                                                                               | 5    | 4                                                                     | 5    | 4                                                                  | 5    | 1                                                                                             | 1    | 3                                                                   | 1    | 2                                                     | 1    | 2                                                                                   | 1    | 1                                                             | 1    |

The respondents specified their level of agreement as points: (1) Strongly disagree; (2) Disagree; (3) Neither agree nor disagree; (4) Agree; (5) Strongly agree.
